## Low Dose Hyperoxia Primes Airways for Fibrosis in Mice after Influenza A Infection

Andrew M. Dylag<sup>1\*</sup>, Jeannie Haak<sup>1</sup>, Rachel Warren<sup>2</sup>, Min Yee<sup>1</sup>, Gloria S. Pryhuber<sup>1</sup> and Michael A. O'Reilly<sup>1</sup>

<sup>1</sup>Department of Pediatrics, University of Rochester Medical Center, Rochester, New York, USA;

<sup>2</sup>Department of Microbiology and Immunology, University of Rochester Medical Center, Rochester, New York, USA

Running Title: Neonatal Hyperoxia and Airway Disease

Corresponding Author:

Andrew Dylag, MD, FAAP  
Division of Neonatology, Department of Pediatrics  
Golisano Children's Hospital  
University of Rochester Medical Center  
601 Elmwood Avenue, Box 651  
Rochester, NY 14642  
Phone: 585-275-5948  
Fax: 585-461-3614  
Email: [andrew\\_dylag@urmc.rochester.edu](mailto:andrew_dylag@urmc.rochester.edu)  
ORCID: 0000-0001-5085-5873

Statement of Financial Support: Supported by a grant from the Strong Children's Research Center at the University of Rochester and National Institutes of Health grant R01 HL091968 (MOR). NIH Center Grant P30 ES001247 supported the animal inhalation facility and the tissue-processing core. The human subject studies were supported by NHLBI Molecular Atlas of Lung Development Program Human Tissue Core grant U01HL122700 and U01HL148861 (G.H. Deutsch, T.J. Mariani, G.S. Pryhuber).

Disclosure Statement: The authors have no financial conflicts to disclose and have agreed to submission of this article.

Category of study: Basic Science

Key words: Influenza A, neonatal hyperoxia, airway hyperreactivity

Abstract: 247 words

Manuscript (not including figure legends): 4542

1 **Abstract**

2 It is well known that supplemental oxygen used to treat preterm infants in respiratory distress is  
3 associated with permanently disrupting lung development and the host response to influenza A virus  
4 (IAV). However, many infants who go home with normally functioning lungs are also at risk for  
5 hyperreactivity after a respiratory viral infection suggesting neonatal oxygen may have induced hidden  
6 molecular changes that may prime to the lung for disease. We discovered that thrombospondin-1 (TSP-  
7 1) is elevated in adult mice exposed to high-dose neonatal hyperoxia that is known to cause alveolar  
8 simplification and fibrotic lung disease following IAV infection. TSP-1 was also elevated in a new, low-  
9 dose hyperoxia mouse model (40% for 8 days; 40x8) that we recently reported causes a transient  
10 change in lung function that resolves by 8 weeks of age. Elevated TSP-1 was also identified in human  
11 autopsy samples of BPD-affected former preterm infants. Consistent with TSP-1 being a master TGF $\beta$   
12 regulator, an early transient activation of TGF $\beta$  signaling, increased airway hyperreactivity, and  
13 peribronchial inflammation and fibrosis were seen when 40x8 mice were infected with IAV, which was  
14 not seen in infected room air controls. These findings reveal low dose of neonatal hyperoxia that does  
15 not affect lung function or structure may still change expression of genes, such as TSP-1, that may  
16 prime the lung for disease following respiratory viral infections, and may help explain why former  
17 preterm infants who have normal lung function are susceptible to airway obstruction and increased  
18 morbidity after viral infection.

## 19 INTRODUCTION

20 It is well accepted that early oxygen (O<sub>2</sub>) exposure in preterm infants can disrupt lung  
21 development and function in extremely low gestational age newborns (ELGANs, <29 weeks gestation),  
22 often resulting in Bronchopulmonary Dysplasia (BPD). Cumulative O<sub>2</sub> exposure strongly predicts BPD  
23 diagnoses and severity, but approximately 40% of ELGANs escape the BPD “label” because they are  
24 weaned off O<sub>2</sub> or respiratory support by 36 weeks’ corrected age despite having significant  
25 supplemental O<sub>2</sub> exposure (29, 60). Former ELGANs *with and without* BPD experience increased  
26 morbidity that can be linked to cumulative O<sub>2</sub> exposure with increased health care utilization,  
27 symptomatic airway disease, and asthma medication use (18, 43, 57). Former ELGANs are especially  
28 vulnerable to respiratory viral infections with increased early childhood hospitalizations for respiratory  
29 illnesses (12, 24, 51) through poorly understood mechanisms. Infection-related lung injury results in  
30 airway remodeling and longer-term airway hyperreactivity (AHR) (26, 36, 46, 65), despite increased  
31 prescriptions for asthma-related medications (53, 54). The airway dysfunction is *not* bronchodilator  
32 responsive, distinguishing it from asthma (23). Thus, there is an urgent need to uncover novel  
33 mechanisms responsible for airway dysfunction and wheezing in former ELGANs.

34 Neonatal hyperoxia is one of the most commonly used exposures in animal models to perturb  
35 lung development and model BPD (10). Mice are born in the saccular stage of lung development where  
36 airways continue developing and alveolar structure is in its primitive stages, analogous to ELGANs (4).  
37 The dose and duration of hyperoxia matters when modeling neonatal O<sub>2</sub> exposure in mice. For  
38 example, multiple studies, including several from our own laboratory, show that severe hyperoxia ( $\geq$   
39 60% O<sub>2</sub> for  $\geq$  4 days) creates a BPD-like phenotype (10, 63) with alveolar simplification, airway  
40 remodeling, and viral susceptibility (14, 25, 35, 38, 40, 41, 44, 49, 67), even after a long period of room  
41 air recovery. These previous models, however, are limited because they often use O<sub>2</sub> doses higher  
42 than those seen in real-world NICU settings and cause such profound alveolar simplification that it is  
43 difficult to discern physiological changes in the airway. This led our laboratory to develop a translational  
44 model of low dose chronic hyperoxia (40% O<sub>2</sub> for 8 days; 40x8) which causes transiently increased  
45 airway resistance and decreased lung compliance with AHR and airway smooth muscle hypertrophy at  
46 4 weeks (21), consistent with other studies (61). Interestingly, abnormal lung function, AHR, and

47 smooth muscle hypertrophy all resolve at 8 weeks (21), where mice are morphologically and  
48 functionally “normal.” Taken together, our model of lower O<sub>2</sub> exposures in preterm infants in modern  
49 NICUs shows changes in airway function without overt signs of alveolar simplification. We suggest this  
50 may more accurately replicate preterm infants with increased respiratory morbidity after leaving the  
51 NICU without a diagnosis of BPD.

52 Neonatal hyperoxia also has functional implications when adult mice are challenged with  
53 Influenza A viral (IAV) infection. Previous studies by our laboratory have shown that adult IAV infected  
54 who received higher dose neonatal hyperoxia (100% for 4 days, 100x4) at birth experience persistent  
55 inflammation and parenchymal fibrosis (14, 25, 35, 40, 41, 67). We previously showed that 100x4  
56 hyperoxia depletes cardiomyocytes in the lung which has implications on pulmonary hypertension.  
57 Secondary analysis of that dataset suggests hyperoxia stimulates extracellular matrix thrombospondin  
58 1 (TSP-1) and several members of the A Disintegrin and Metalloproteinase with Thrombospondin  
59 motifs (ADAMTS) family of proteinases which have TSP-1 like activity. Since TSP-1 upregulates TGFβ  
60 activity, we hypothesized that 40x8 adult mice would be primed for increased fibrosis after IAV  
61 infection. Herein, we show that when challenged with the HKx31 H3N2 Influenza A Virus (IAV) adult  
62 40x8 mice develop peribronchial fibrosis after infection not observed in room air (RA) controls, that  
63 pathologically resolves over time, but persistently decreases lung compliance, thus creating a model of  
64 transient morbidity.

## 65 **METHODS**

66 *Animal Exposures and Infection.* All protocols were approved by the Institutional Animal Care  
67 and Use Committee of University of Rochester (Rochester, NY) and were consistent with The  
68 Association for Assessment and Accreditation of Laboratory Animal Care International policies  
69 (Frederick, MD). Litters of C57Bl/6J (Jackson Laboratory, Bar Harbor, ME) were placed into room air  
70 (RA) or 40% oxygen from post-natal day (PND) 0-8 as previously described (21). Nursing dams were  
71 rotated every 24-48 hours. After exposure, pups were allowed to mature until PND 56 under room air  
72 conditions where a subset of naïve mice were harvested for pulmonary function or qRT-PCR analysis.  
73 Infected mice were lightly anesthetized with ketamine/xylazine mixture and given  $10^5$  plaque forming  
74 units (PFUs) influenza A (x31/H3N2) virus, which was grown and titered in Madin-Darby Canine Kidney  
75 (MCDK) cells as previously described (64). Mice were weighed every other day for two weeks after  
76 infection, then weekly thereafter.

77 *Bronchoalveolar Lavage.* Bronchoalveolar lavage (BAL) was performed in a subset of animals  
78 at post-infection day (PID) 3, 7, 10, and 14 with 3 separate 1 mL aliquots of ice-cold phosphate-  
79 buffered saline (PBS, FisherScientific, Hampton, NH), as previously described (14). The first  
80 supernatant was collected for protein analysis and frozen at  $-80^{\circ}\text{C}$  for further analysis.

81 *Cell differentiation.* BAL Fluid (BALF) from all 3 aliquots were combined, then separated by  
82 centrifugation with removal of erythrocytes in ammonium chloride lysing solution (0.15 M  $\text{NH}_4\text{Cl}$ , 10 mM  
83  $\text{NaHCO}_3$ , 1 mM EDTA). Total cell count was measured with a TC20 Automated Cell counter (Bio-Rad,  
84 Hercules, CA). BALF was then transferred onto slides with a cytological centrifuge (Shandon Cytospin  
85 2, Runcorn, UK) and stained with a Hema 3 Stain Set (FisherScientific, Hampton, NH). Images of  
86 stained cells were taken with a Nikon E800 microscope (Nikon Instruments Inc., Melville, NY) using a  
87 SPOT RT3 Camera and SPOT Imaging Software (v5.2, Diagnostic Instruments, Inc., Sterling Heights,  
88 MI). At least 200 cells were counted per slide with ImageJ (NIH, Bethesda, MD).  
89 Macrophages/monocytes, neutrophils, and lymphocytes were individually enumerated by two separate  
90 investigators.

91 *Protein analysis.* BALF was analyzed using a DuoSet ELISA kit for Mouse CCL2/JE/MCP-1 and  
92 TGF- $\beta$ 1 (R&D Systems, Minneapolis, MN) according to the manufacturer's instructions using a

93 SpectraMax M5 Microplate Reader (Molecular Devices, San Jose, CA) and Softmax Pro 6.4 (Molecular  
94 Devices). The detection range for this assay was 3.9-250 pg/mL. Additionally, latent TGF- $\beta$ 1 was  
95 activated by incubating samples with 1N HCl and neutralizing with 1.2 N NaOH/0.5 M HEPES, as per  
96 kit instructions, and another ELISA performed to measure immunoreactive TGF- $\beta$ 1.

97 *Pulmonary Function Testing.* Naïve (8-10 weeks old) and IAV-infected (14 and 56 days post-  
98 infection) mice were anesthetized with a ketamine/xylazine mixture [100 mg/kg (Par Pharmaceutical,  
99 Chestnut Ridge, NY) and 20 mg/kg (Acorn, Inc., Lake Forest, IL), respectively], immobilized with  
100 pancuronium bromide (10 mg/kg, Sigma-Aldrich, St. Louis, MO), and ventilated (SCIREQ Inc.,  
101 Montreal, Canada) with a tidal volume of 10 ml/kg, 150 breaths/min, PEEP of 3 cm H<sub>2</sub>O, and FIO<sub>2</sub> of  
102 21% as previously described (21). Respiratory system resistance ( $R_{rs}$ ), Newtonian airway resistance  
103 ( $R_N$ ), respiratory system compliance ( $C_{rs}$ ), Elastance (H), Tissue Damping (G), hysteresivity ( $\eta$ , eta)  
104 were measured in triplicate at both time points.

105 *Human Tissues.* Donor lungs samples were provided through the federal United Network of  
106 Organ Sharing via National Disease Research Interchange (NDRI) and International Institute for  
107 Advancement of Medicine (IIAM) and entered into the NHLBI LungMAP Biorepository for Investigations  
108 of Diseases of the Lung (BRINDL) at the University of Rochester Medical Center overseen by the IRB  
109 as RSRB00047606, as previously described (5, 7). Lung tissue sections were uniformly obtained from  
110 the right lower lobe of 6 infants, 3 infants born prematurely (25, 26, and 28 gestational weeks) that died  
111 between 84 and 86 weeks post-menstrual age with BPD (2 ventilator dependent, died of respiratory  
112 failure, 1 with chronic lung disease, but not vent dependent died of accidental event) and 3 infants,  
113 each born full term and died at 74 to 100 weeks post-menstrual age of other non-pulmonary causes (n  
114 = 3 in each group). No acute viral infections were reported in the past medical history of any infant.  
115 Sections (5  $\mu$ m) of formalin inflated, paraffin embedded RLL parenchymal lung tissue blocks were de-  
116 paraffinized, re-hydrated, and stained for Anti-Thrombospondin 1 (ab85762, abcam, Cambridge, UK)  
117 and DAPI Fluoromount-G (SouthernBiotech, Birmingham, AL).

118 *Immunohistochemistry.* At PIDs 14 and 56, right lobes of lungs were snap-frozen for qRT-PCR,  
119 and left lobes perfused with 10% neutral buffered formalin (NBF, Fisher Scientific, Hampton, NH) at 25  
120 mm/Hg, embedded in paraffin wax, and cut to 4  $\mu$ m thick. Additional samples were taken after saline

121 flush with 1x PBS, before perfusion with NBF. Lung slices were stained with Hematoxylin and Rubens  
122 Eosin-Phloxine (H&E; Biocare Medical, Concord, CA) and Gomori's Trichrome (Richard-Allan Scientific,  
123 San Diego, CA) for collagen.

124 Fluorescent immunohistochemistry was performed with primary antibodies S100A4 (FSP-1)  
125 (1:1000, PA5-82322, ThermoFisher Scientific, Waltham, MA), Anti-Influenza A Virus Nucleoprotein (NP;  
126 NR-43899, BEI Resources, Manassas, VA) or Anti-Thrombospondin 1 (ab85762, abcam, Cambridge,  
127 UK), with secondary antibody AlexaFluor 594 (1:200, A21207, ThermoFisher Scientific) and DAPI  
128 Fluoromount-G counterstain to view activated macrophages. Stained images were taken with a Nikon  
129 E800 microscope (Nikon Instruments Inc., Melville, NY) using a SPOT RT3 Camera and SPOT Imaging  
130 Software (v5.2, Diagnostic Instruments, Inc., Sterling Heights, MI). Photographs were analyzed with  
131 ImageJ.

132 *Fibroblast and collagen staining.* FSP1 and Sirius red staining were quantified using ImageJ.  
133 Fluorescent images of each airway were taken under red (FSP1, Sirius red) and blue (DAPI) channels.  
134 A threshold for each fluorescence was set, and the same used for all images taken. Airway perimeter  
135 was measured to ensure only small airways analyzed, then enlarged by 40 (Sirius red) and 80  $\mu\text{m}$   
136 (FSP1). Particle area (Sirius red) and number (FSP1) were measured, to determine their prevalence  
137 surrounding the airways.

138 *qRT-PCR.* RNA was extracted from tissue with TRIzol Reagent (Invitrogen, Carlsbad, CA) as  
139 previously described (69). Complimentary DNA was run on a C1000 ThermoCycler (Bio-Rad) using a  
140 Maxima First Strand cDNA Synthesis Kit (ThermoScientific). Quantitative real-time PCR was performed  
141 using iQ SYBR Green Supermix (Bio-Rad) with CFX96 Real-Time System (Bio-Rad). Genes of interest  
142 where run on plates with *mGapdh* as housekeeping gene, and analyzed using the  $\Delta\Delta C_T$  method (33).  
143 Three to four samples per treatment were run in duplicate on each plate. Primer sequences can be  
144 found in Table 1.

145            *Statistical Analysis.* Statistical analyses were performed in GraphPad Prism (GraphPad  
146 Software v8, San Diego, CA). Pulmonary function data was subjected to D'Agostino & Pearson and  
147 Shapiro-Wilk tests for normality, Brown-Forsythe test for variance, and ordinary one-way ANOVA with  
148 Tukey's multiple comparisons test for significance. In instances of failed normality or variance, Kruskal-  
149 Wallis non-parametric and Dunn's multiple comparisons tests were performed for significance. Weight  
150 over time was tested for normality and variance, as described above, and multiple t-tests performed  
151 with Holm-Sidak correction. Cell differentiation data and ELISA data was subjected to Shapiro-Wilk test  
152 for normality. Holm-Sidak correction for multiple comparisons was used to further test cell differentiation  
153 and Kruskal-Wallis non-parametric and Dunn's multiple comparisons tests were performed for  
154 significance on ELISA data. qRT-PCR data was analyzed using the  $\Delta\Delta C_T$  method, and graphed as fold-  
155 change normalized to RA = 1. *P* values of  $\leq 0.05$  were considered significant for all analyses  
156 performed, and values graphed as mean  $\pm$  SEM.



157 **Results**

158 *Molecular differences persist in low-dose hyperoxia-exposed mice after Room Air Recovery*

159 RA and 40x8 uninfected (naïve) mice were recovered in room air until 8-10 weeks of age  
160 (PND56, Figure 1A). We confirmed that RA and 40x8 animals have similar alveolar and airway  
161 structure by histology (Figure 1B), consistent with our laboratory's previously published study (21).  
162 Furthermore, pulmonary function, measurements were similar between RA and 40x8 adult mice at this  
163 time point (Figure 1C). To determine whether adult RA and recovered 40x8 lungs had similar gene  
164 expression, we examined a previously published Affymetrix array in adult mice who received high-dose  
165 (100x4 oxygen at birth for candidate genes (68). Out of 45,109 probes present on the array, 54  
166 transcripts were differentially expressed between the RA and the 100x4 mice using a false discovery  
167 rate of 10%. Neonatal hyperoxia reduced expression of 43 genes, most of which reflected a loss of  
168 pulmonary cardiomyocytes (68). We analyzed the upregulated transcripts for genes regulating  
169 inflammation using qRT-PCR and found the extracellular matrix protein thrombospondin 1 (TSP-1) and  
170 several members of the A Disintegrin and Metalloproteinase with Thrombospondin motifs (ADAMTS)  
171 family of proteinases were upregulated in the high dose 100x4 model (Figure 1D). TSP-1 and  
172 ADAMTS share common functions in their ability to activate latent TGF $\beta$  through conformational  
173 change of the latent binding protein that opens the binding site of TGF $\beta$  to its receptor (16). We  
174 confirmed that TSP-1 expression is increased 40x8 in adult mice and did not detect increased ADAMTS  
175 proteinases at high enough levels to justify further study (Figure 1D), thus choosing to focus on TSP-1.

176

177 *TSP-1 expression is increased in hyperoxia-exposed mice and humans with BPD*

178 To evaluate the prevalence and distribution of TSP-1, tissue sections of naïve 40x8 mice and  
179 BPD-affected human tissue samples were stained with TSP-1 antibody and counterstained with DAPI.  
180 In 40x8 mice, TSP-1 was increased in the alveolar spaces (Figure 2A) but less noticeable around the  
181 airways. In humans (N=3 controls, N=3 BPD lungs), increased TSP-1 was similarly detected in the  
182 alveolar spaces of 2/3 BPD infants where staining was much more sparse in control infants (Figure 2B).

183

184 *TGF $\beta$  signaling is altered in adult animals exposed to neonatal hyperoxia*

185 To determine if key TGF $\beta$  signaling pathway mediators were different between RA and 40x8  
186 animals, qRT-PCR was performed on naïve RA and 40x8 adult mice. We did not observe increased  
187 expression of TGF $\beta$ -R1, or any of the canonical SMAD genes (Figures 3A, D, E, and F). Conversely,  
188 there was a strong trend for decreased *Tgfb-R2* and *Tgfb-R3* in naïve mice before infection (Figures  
189 3B, C).

190

### 191 *Oxygen Exposed Mice Have Worse Airway Disease after Influenza Infection*

192 Since TSP-1 activates TGF $\beta$ , we wanted to test the hypothesis that the 40x8 lung was primed to  
193 activate TGF $\beta$  signaling following an insult. We administered IAV to hyperoxia and RA exposed mice as  
194 a profibrotic challenge, because IAV causes fibrosis in mice and hyperoxia-exposed infants have  
195 increased morbidity after viral infections. To test this hypothesis, adult RA (RA-PBS or RA-x31) and  
196 40x8 (O<sub>2</sub>-PBS or O<sub>2</sub>-x31) mice were nasally inoculated with HKx31 IAV or sham (PBS) (Figure 4A).  
197 Infection was confirmed by positive nucleoprotein (NP) staining in the airway club cells, indicating active  
198 IAV infection in both RA-x31 and O<sub>2</sub>-x31 animals (Figure 4B). Two weeks after infection, persistent  
199 airway inflammation (Figure 4C) and fibrosis (Figure 4D) were observed in O<sub>2</sub>-treated animals  
200 compared to RA controls. To confirm increased fibrosis in O<sub>2</sub>-x31 animals, Sirius Red collagen staining  
201 was performed (Figure 4E), imaged, and quantified in both groups with a focus on the peribronchial  
202 spaces. Again, we observed increased Sirius Red staining (Figure 4F) in 40x8 animals 2 weeks post-  
203 infection. Weight loss over the first two post-infection weeks were not different between the RA-x31 and  
204 O<sub>2</sub>-x31 groups during the first two post-infection weeks through 8 weeks post-infection, whereas sham  
205 animals appropriately did not lose weight (Figure 4G). There were no differences in weight loss  
206 between male and female mice (data not shown). The observed histologic changes resolved by 8  
207 weeks post-infection (Figure 4H).

208 Comprehensive assessments of pulmonary function were performed at both 2 and 8 weeks post  
209 infection to determine if the observed histologic findings had a physiologic correlate. At two weeks post  
210 infection, 40x8 animals had higher total Respiratory System Resistance (R<sub>rs</sub>, Figure 5A), Newtonian  
211 Airway Resistance (R<sub>N</sub>, Figure 5B), and Elastance (H, Figure 5E) with decreased Respiratory System  
212 Compliance (C<sub>rs</sub>, Figure 5C). Tissue damping (G, Figure 5D) and hysteresivity ( $\eta$ , Figure 5F) were

213 unchanged. The magnitude of the changes in  $R_N$  (which contributes to  $R_{rs}$ ) signify the majority of  
214 resistance change is due to changes in airway resistance. Interestingly, at 8 weeks post infection, the  
215 resistance changes normalized (Figures 5A-B), whereas the compliance and elastance (Figures 5C,  
216 5E) remained persistently abnormal in the 40x8 animals where the RA animals returned to their  
217 previous levels. This suggests that lung function has reached a new, lower physiologic baseline, even  
218 after a long period of room-air recovery.

219

### 220 *Oxygen Exposed Mice have Persistent Peribronchial Inflammation*

221 We next sought to determine whether low dose  $O_2$  exposure is associated with increased  
222 inflammatory cells similar to our previous studies using high-dose (100x4) oxygen (39).  
223 Bronchoalveolar Lavage Fluid (BALF) was obtained, spun, and quantified with differential cell counts at  
224 4 time points during infection: days 3, 7, 10, and 14. Though we found a slight increase in total cell  
225 counts and neutrophils 7 days post infection in RA-x31 animals (Figure 6A-B), cell counts were  
226 otherwise similar between groups at the 3, 7, and 10 day time points. However,  $O_2$ -x31 animals had  
227 trends for increased total and macrophage cell counts, 14 days after infection (Figure 6A, 6D).  
228 Quantification of MCP-1 protein was similar at all time points during infection (data not shown),  
229 distinguishing it from other studies in our laboratory (13), indicating that there may be alternate  
230 mechanisms driving increased inflammation in this model. To better characterize the inflammatory cells  
231 present around the airways, tissue sections were stained for fibroblast stimulatory protein 1 (FSP1), a  
232 marker shown to identify inflammatory subpopulations of macrophages (42). Increased FSP1 staining  
233 was concentrated around the small airways at 14 days post infection (Figure 6F) and was detected  
234 more frequently in  $O_2$ -x31 animals (Figure 6G). Notably, FSP-1 staining was almost absent in the  
235 alveolar spaces with no differences detected between RA-x31 and  $O_2$ -x31 animals (data not shown).

236 The histologic, physiologic, and phenotypic differences in 40x8 animals led us to investigate  
237 possible mechanisms by which increased inflammation and fibrosis would be present and drive  
238 increased pulmonary morbidity after IAV infection. We analyzed BAL fluid for TGF $\beta$  using ELISA and  
239 observed a strong trend for increased active/total TGF $\beta$  3 days post infection that normalized by 7 days  
240 (Figure 6E).

241 **DISCUSSION**

242 Airway disease in former ELGANs is characterized by increased airflow obstruction in infancy  
243 (31), specifically in the mid-to-later forced expiratory flows (47, 52). These functional deficits predispose  
244 ELGANs to wheezing in infancy and childhood irrespective of their BPD status (8, 9, 15, 27, 28, 32, 56).  
245 Since BPD is often defined by need for supplemental O<sub>2</sub> near term corrected gestational age (60),  
246 many infants who were exposed to O<sub>2</sub> escape the BPD diagnosis, but still have significant pulmonary  
247 morbidity associated with their extreme prematurity. Our laboratory has performed several clinical  
248 studies quantifying cumulative O<sub>2</sub> exposure in ELGANs *with and without BPD* and have shown that  
249 ELGANs with increased O<sub>2</sub> exposure have worse obstructive lung disease (FEV<sub>0.5</sub>/FVC ratio), but “high”  
250 and “low” O<sub>2</sub> exposed ELGANs have significant airflow obstruction (FEF<sub>75</sub>) compared to term infants at  
251 1-year of age (22). Those functional studies were performed in asymptomatic, well ex-preterm infants,  
252 but there is an abundance of evidence that when challenged with a respiratory infection, former  
253 ELGANs have more significant lower airway symptoms with wheezing suggesting airflow obstruction  
254 and increased rehospitalization rates (20, 55, 65). These clinical studies emphasize that there is a  
255 spectrum of lung disease present in former ELGANs, and thus justifies studying a spectrum of O<sub>2</sub>  
256 exposures in the laboratory that more closely model variant neonatal exposures, focusing on airway  
257 pathology to determine their impacts on lung development, function, and response to infection.

258 Using these ELGAN studies, we sought to create a translationally relevant paradigm of low-  
259 dose neonatal hyperoxia to show that mice are primed for airway disease when challenged with  
260 respiratory viral infection in adulthood. We chose 40% oxygen for 8 days because our previous studies  
261 showed that 40x8 mice have transiently increased airway hyperreactivity at 4 weeks of age that  
262 resolves by 8 weeks, such that the recovered animal is functionally and phenotypically indistinguishable  
263 from RA controls. This distinguishes it from other models wherein prolonged high O<sub>2</sub> concentrations  
264 cause significant alveolar simplification, making it difficult to discern and isolate differences in airway  
265 pathology. Relatively low-dose 40x8 oxygen does not cause significant alveolar simplification, though if  
266 left in 40% oxygen for longer periods subtle changes in alveolar structure are detectable (37). We  
267 wanted to test if the “repaired” lung after hyperoxia would respond similarly to a RA animal when  
268 challenged with influenza A virus and hypothesized based on other studies from our laboratory (14, 25,

269 35, 40, 41, 67) that there would be persistently altered response to IAV, even after a long period of RA  
270 recovery. We chose HKx31 strain of influenza because it causes lower-airway symptoms, usually  
271 without mortality, and mice respond to IAV similarly compared to humans (19, 30, 58); unlike some  
272 other viruses (e.g. Respiratory Syncytial Virus) more commonly seen in infants that are difficult to  
273 model in mice. Our model is robust such that it recapitulates several observations in former ELGANs: 1)  
274 O<sub>2</sub> causes changes in baseline airway mechanics, 2) airway changes are not overwhelmed by alveolar  
275 simplification, and 3) O<sub>2</sub> exposed mice show increased severity of disease with viral infection.  
276 Additionally, many hyperoxia mouse models administer virus right when animals come out of hyperoxia,  
277 whereas this model allows for RA recovery and post-hyperoxia lung repair. Our 40x8 infection model  
278 occurs long after cessation of oxygen exposure, which has translational strengths to reflect former  
279 ELGANs later in infancy. Finally, other published models of airway dysfunction often treat animals with  
280 allergen or methacholine to observe differences in AHR. While this has been useful in identifying  
281 changes in airway smooth muscle, it may not explain airway disease of prematurity because these  
282 children often spontaneously wheeze following viral infections yet medications targeting airway smooth  
283 muscle relaxation (bronchodilators) are most often ineffective. Similarly, our infection-related changes  
284 are evident at baseline and without methacholine, implicating alternate mechanisms of airway  
285 pathology in O<sub>2</sub> exposed mice apart from smooth muscle bronchospasm, distinguishing it from asthma.

286 We showed that 40x8 mice have increased airway-specific fibrotic repair resulting in  
287 hyperactive airways, associated with TGF $\beta$  hyperactivation, and delayed inflammatory resolution  
288 compared to room air controls. Our laboratory previously established a mouse model of high-dose  
289 neonatal hyperoxia (100% x 4 days; 100x4) followed by adult IAV infection associated with increased  
290 MCP1, marked *alveolar parenchymal fibrosis*, and increased mortality. In this paradigm, 100x4 mice  
291 have interstitial fibrosis, enhanced epithelial cell death, and increased mortality when exposed to IAV as  
292 adults (14, 25, 35, 40, 41, 67). These changes were partially attributed to the loss of type II alveolar  
293 epithelial cells (AEC2s) (69), but since 40x8 hyperoxia does not cause loss of AEC2s, other  
294 mechanisms driving disease severity were considered. IAV infection of 40x8 mice using the same virus  
295 increased morbidity, and was associated with peribronchial fibrosis 2 weeks after infection not observed  
296 in RA controls. Pulmonary function was abnormal with increased resistance and elastance and

297 decreased compliance. We observed delayed clearance of immune cells 2 weeks after infection with  
298 increased staining for activated macrophages (fibroblast-specific protein 1, FSP-1 (42)) in 40x8 animals  
299 and trends for increased total and macrophage cell count in bronchoalveolar lavage fluid at that time  
300 point. IAV infection in 40x8 mice was not associated with increased weight loss or monocyte  
301 chemoattractant protein-1 (MCP-1) (13) (data not shown) as previously reported. Finally, 8 weeks after  
302 infection, the resistance changes resolve leaving behind subtle significant changes in compliance,  
303 establishing a model of intermittent morbidity that causes a downward shift in baseline lung function  
304 after infection in O<sub>2</sub>-x31 animals.

305         The peribronchial fibrosis changes in our model are associated with TGF $\beta$  hyperactivation. The  
306 TGF $\beta$  pathway regulates normal alveolar lung development (71). Global/floxed knockouts of TGF $\beta$  or  
307 key pathway mediators results in impaired alveolarization (50), but its role in airway development is  
308 more poorly defined. TGF $\beta$ 1 signals through the canonical SMAD and/or non-SMAD dependent  
309 pathways to regulate gene expression, which in the lung can promote ECM collagen deposition and  
310 remodeling. The TGF $\beta$  signaling machinery changes both its expression and localization within the lung  
311 across developmental stages. Notably, TGF $\beta$ -R1 (receptor 1, ALK5), TGF $\beta$ -R2 (receptor 2), and  
312 SMAD3 decrease in expression throughout development, but change localization from vessels to  
313 airways as mice age such that when alveolarization is complete very little staining is evident in the  
314 alveolar spaces (3). This same study demonstrated that similar processes occur during human  
315 development, with most staining evident in the airways or vascular smooth muscle layer for ALK1,  
316 TGF $\beta$ -R1/ALK5, TGF $\beta$ -R2, and SMAD2. The evolutionary reason behind these changes throughout  
317 development have not been fully established, but may be concentrated in the areas of greatest lung  
318 growth during alveolarization. Dysregulation of the TGF $\beta$  pathway and its machinery has been  
319 implicated in hyperoxia-induced lung injury (2, 59, 66). Specifically, higher dose (85% O<sub>2</sub> x 28 days)  
320 hyperoxia leads to a 4-fold increase and relocalization of the TGF- $\beta$ 2 receptor to the airway epithelium  
321 (2). Similarly, hyperoxia leads to a 6-fold increase co-SMAD/SMAD4 staining, also notable in the airway  
322 epithelium and alveolar septae (2). However, whole lung expression of these TGF $\beta$  pathway  
323 components in adult mice after 40x8 hyperoxia, was not increased, which led us to further investigate  
324 TSP-1 as a protein of interest.



325 Our finding of increased TSP-1 may provide mechanistic insight into IAV-related morbidity in  
326 hyperoxia exposed mice and humans with BPD. TSP-1 is a calcium binding ECM glycoprotein first  
327 discovered in platelet granules (6) and later localized to many other tissues including the lung (1). TSP-  
328 1 is synthesized by endothelial cells, fibroblasts, smooth muscle cells, monocytes, and macrophages  
329 (34) and interacts with several ECM components including integrins, fibronectin, cell receptors, growth  
330 factors (like TGF $\beta$ -1), cytokines, and proteases (11, 45). Antiangiogenesis, smooth muscle proliferation,  
331 nitric oxide signaling antagonism, and inflammation regulation are known functions of TSP-1 relevant to  
332 the lung (1). TSP-1 is required to form normal airway epithelium, as TSP1-null animals have bronchial  
333 epithelial hyperplasia, proximal mucous metaplasia, vascular smooth muscle hyperplasia, club cell  
334 hyperplasia, and uncontrolled inflammation (16). In contrast, upregulation of TSP-1 was noted in the  
335 preterm ventilated lung on autopsy (17), an in utero model of tracheal occlusion (62) (lung stretch), and  
336 other profibrotic diseases, but to our knowledge this has not been further explored in BPD. The BPD  
337 model is of particular interest because TSP-1 may play a role in capillary rarefaction (also seen in  
338 mouse hyperoxia models (70)) and contribute to other hyperoxia-induced diseases such as pulmonary  
339 hypertension (48). Indeed, we confirmed increased alveolar staining for TSP-1 in both 40x8 exposed  
340 adult mice and BPD-affected human infants. The balanced regulation of TGF $\beta$  is vital for survival as  
341 TSP1-null and TGF $\beta$ -1-null mice both die of similar phenotypes (pneumonia) within weeks of birth (16).  
342 The strikingly similar phenotype of TSP1-null and TGF $\beta$ -1-null mice suggest that TSP-1 is the main  
343 TGF $\beta$  activator *in vivo* (16). Together, these previous studies on TSP-1/TGF $\beta$  create a potential “dual  
344 priming” effect of neonatal hyperoxia on the airway by the following mechanisms: 1) TGF $\beta$  receptor and  
345 signaling molecules localize to the airway throughout development and/or during hyperoxia exposure  
346 and 2) increased TSP-1 is primed to hyperactivate TGF $\beta$ . Thus, TSP-1 is an intriguing candidate for  
347 further study in rodent BPD models and in the extremely preterm infant.

348 Our results suggest low-dose neonatal O<sub>2</sub> causes “silent” changes in gene expression with long-  
349 term functional consequences after a lung insult such as respiratory viral infection, and that the  
350 “repaired” lung still reacts abnormally to a profibrotic stimulus such as IAV. This 40x8 hyperoxia model  
351 causes an airway-specific phenotype observed at baseline and drives increased respiratory morbidity  
352 after infection, thus recapitulating airway diseases observed in former ELGANs. We can now exploit

353 this model to better understand the origins of TGF $\beta$  hyperactivation (including TSP-1 as a candidate  
354 protein), and determine its source and specificity for the viral responses that may explain infection  
355 related morbidity in vulnerable former ELGANs.

356

### 357 **Acknowledgments**

358 The authors would like to acknowledge Ethan David Cohen for his technical assistance and advice  
359 regarding the manuscript, and thank Biorepository for Investigation of Neonatal Diseases of the Lung  
360 (BRINDL) part of the Clinical and Translational Science Institute Informatics, Research Data Integration  
361 and Analytics group, University of Rochester Medical Center, for human tissue samples.

362 We are extremely grateful to the families who have generously given precious gifts to support this  
363 research. We thank the members of the LungMAP Consortium for their collaborations and the members  
364 of the Pryhuber lab (Amanda Howell, Heidie Huyck, and Cory Poole) who prepared the human lung  
365 tissue.

### 366 **Author Contributions**

367 AMD conceived the study and designed experiments. AMD and JH performed experiments with  
368 assistance from MY and RW. AMD and JH interpreted the data and wrote the manuscript. GSP curated  
369 the human tissue samples, and revised the manuscript. MOR conceived the study, revised the  
370 manuscript. All authors approved of the final version.

### 371 **Statement of Financial Support**

372 Supported by a grant from the Strong Children's Research Center at the University of Rochester and  
373 National Institutes of Health grant R01 HL091968 (MOR). NIH Center Grant P30 ES001247 supported  
374 the animal inhalation facility and the tissue-processing core. The human subject studies were supported  
375 by NHLBI Molecular Atlas of Lung Development Program Human Tissue Core grant U01HL122700 and  
376 U01HL148861 (G.H. Deutsch, T.J. Mariani, G.S. Pryhuber).

377

### 378 **Disclosure**

379 The authors declare that no conflict of interest exists.



380 **References**

381

- 382 1. **Adams JC, and Lawler J.** The thrombospondins. *Cold Spring Harb Perspect Biol* 3: a009712,  
383 2011.
- 384 2. **Alejandre-Alcazar MA, Kwapiszewska G, Reiss I, Amarie OV, Marsh LM, Sevilla-Perez J,**  
385 **Wygrocka M, Eul B, Kobrich S, Hesse M, Schermuly RT, Seeger W, Eickelberg O, and Morty RE.**  
386 Hyperoxia modulates TGF-beta/BMP signaling in a mouse model of bronchopulmonary dysplasia. *Am J*  
387 *Physiol Lung Cell Mol Physiol* 292: L537-549, 2007.
- 388 3. **Alejandre-Alcazar MA, Michiels-Corsten M, Vicencio AG, Reiss I, Ryu J, de Krijger RR,**  
389 **Haddad GG, Tibboel D, Seeger W, Eickelberg O, and Morty RE.** TGF-beta signaling is dynamically  
390 regulated during the alveolarization of rodent and human lungs. *Dev Dyn* 237: 259-269, 2008.
- 391 4. **Amy RW, Bowes D, Burri PH, Haines J, and Thurlbeck WM.** Postnatal growth of the mouse  
392 lung. *J Anat* 124: 131-151, 1977.
- 393 5. **Ardini-Poleske ME, Clark RF, Ansong C, Carson JP, Corley RA, Deutsch GH, Hagood JS,**  
394 **Kaminski N, Mariani TJ, Potter SS, Pryhuber GS, Warburton D, Whitsett JA, Palmer SM,**  
395 **Ambalavanan N, and Lung MAPC.** LungMAP: The Molecular Atlas of Lung Development Program.  
396 *American journal of physiology Lung cellular and molecular physiology* 313: L733-L740, 2017.
- 397 6. **Baenziger NL, Brodie GN, and Majerus PW.** A thrombin-sensitive protein of human platelet  
398 membranes. *Proc Natl Acad Sci U S A* 68: 240-243, 1971.
- 399 7. **Bandyopadhyay G, Huyck HL, Misra RS, Bhattacharya S, Wang Q, Mereness J, Lillis J,**  
400 **Myers JR, Ashton J, Bushnell T, Cochran M, Holden-Wiltse J, Katzman P, Deutsch G, Whitsett**  
401 **JA, Xu Y, Mariani TJ, and Pryhuber GS.** Dissociation, cellular isolation, and initial molecular  
402 characterization of neonatal and pediatric human lung tissues. *American journal of physiology Lung*  
403 *cellular and molecular physiology* 315: L576-L583, 2018.
- 404 8. **Baraldi E, Carraro S, and Filippone M.** Bronchopulmonary dysplasia: Definitions and long-  
405 term respiratory outcome. *Early Hum Dev* 85: S1-S3, 2009.
- 406 9. **Been JV, Lugtenberg MJ, Smets E, van Schayck CP, Kramer BW, Mommers M, and**  
407 **Sheikh A.** Preterm birth and childhood wheezing disorders: a systematic review and meta-analysis.  
408 *PLoS Med* 11: e1001596, 2014.
- 409 10. **Berger J, and Bhandari V.** Animal models of bronchopulmonary dysplasia. The term mouse  
410 models. *Am J Physiol-Lung C* 307: L936-L947, 2014.
- 411 11. **Bornstein P.** Diversity of function is inherent in matricellular proteins: an appraisal of  
412 thrombospondin 1. *J Cell Biol* 130: 503-506, 1995.
- 413 12. **Broughton S, Roberts A, Fox G, Pollina E, Zuckerman M, Chaudhry S, and Greenough A.**  
414 Prospective study of healthcare utilisation and respiratory morbidity due to RSV infection in  
415 prematurely born infants. *Thorax* 60: 1039-1044, 2005.
- 416 13. **Buczynski BW, Yee M, Martin KC, Lawrence BP, and O'Reilly MA.** Neonatal hyperoxia  
417 alters the host response to influenza A virus infection in adult mice through multiple pathways.  
418 *American journal of physiology Lung cellular and molecular physiology* 305: L282-290, 2013.
- 419 14. **Buczynski BW, Yee M, Martin KC, Lawrence BP, and O'Reilly MA.** Neonatal hyperoxia  
420 alters the host response to influenza A virus infection in adult mice through multiple pathways. *Am J*  
421 *Physiol-Lung C* 305: L282-L290, 2013.
- 422 15. **Colin AA, McEvoy C, and Castile RG.** Respiratory morbidity and lung function in preterm  
423 infants of 32 to 36 weeks' gestational age. *Pediatrics* 126: 115-128, 2010.
- 424 16. **Crawford SE, Stellmach V, Murphy-Ullrich JE, Ribeiro SM, Lawler J, Hynes RO, Boivin**  
425 **GP, and Bouck N.** Thrombospondin-1 is a major activator of TGF-beta1 in vivo. *Cell* 93: 1159-1170,  
426 1998.
- 427 17. **De Paepe ME, Greco D, and Mao Q.** Angiogenesis-related gene expression profiling in  
428 ventilated preterm human lungs. *Exp Lung Res* 36: 399-410, 2010.

- 429 18. **Di Fiore JM, Dylag AM, Honomichl RD, Hibbs AM, Martin RJ, Tatsuoka C, and Raffay**  
430 **TM.** Early inspired oxygen and intermittent hypoxemic events in extremely premature infants are  
431 associated with asthma medication use at 2 years of age. *J Perinatol* 39: 203-211, 2019.
- 432 19. **Doherty PC, Topham DJ, and Tripp RA.** Analysing the T cell response to influenza viruses in  
433 mouse model systems. *Int Congr Ser* 1123: 153-165, 1996.
- 434 20. **Doyle LW, Ford G, and Davis N.** Health and hospitalizations after discharge in extremely low  
435 birth weight infants. *Semin Neonatol* 8: 137-145, 2003.
- 436 21. **Dylag AM, Haak J, Yee M, and O'Reilly MA.** Pulmonary mechanics and structural lung  
437 development after neonatal hyperoxia in mice. *Pediatr Res* 2019.
- 438 22. **Dylag AM, Kopin HG, O'Reilly MA, Wang H, Davis SD, Ren CL, and Pryhuber GS.** Early  
439 Neonatal Oxygen Exposure Predicts Pulmonary Morbidity and Functional Deficits at One Year. *J*  
440 *Pediatr* 2020. Accepted.
- 441 23. **Filippone M, Carraro S, and Baraldi E.** The term "asthma" should be avoided in describing  
442 the chronic pulmonary disease of prematurity. *The European respiratory journal* 42: 1430-1431, 2013.
- 443 24. **Furman L, Baley J, Borawski-Clark E, Aucott S, and Hack M.** Hospitalization as a measure  
444 of morbidity among very low birth weight infants with chronic lung disease. *J Pediatr* 128: 447-452,  
445 1996.
- 446 25. **Giannandrea M, Yee M, O'Reilly MA, and Lawrence BP.** Memory CD8(+) T Cells Are  
447 Sufficient To Alleviate Impaired Host Resistance to Influenza A Virus Infection Caused by Neonatal  
448 Oxygen Supplementation. *Clin Vaccine Immunol* 19: 1432-1441, 2012.
- 449 26. **Gien J, and Kinsella JP.** Pathogenesis and treatment of bronchopulmonary dysplasia. *Curr*  
450 *Opin Pediatr* 23: 305-313, 2011.
- 451 27. **Greenough A.** Long-term pulmonary outcome in the preterm infant. *Neonatology* 93: 324-327,  
452 2008.
- 453 28. **Halvorsen T, Skadberg BT, Eide GE, Roksund O, Aksnes L, and Oymar K.** Characteristics  
454 of asthma and airway hyper-responsiveness after premature birth. *Pediatric allergy and immunology :*  
455 *official publication of the European Society of Pediatric Allergy and Immunology* 16: 487-494, 2005.
- 456 29. **Higgins RD, Jobe AH, Koso-Thomas M, Bancalari E, Viscardi RM, Hartert TV, Ryan RM,**  
457 **Kallapur SG, Steinhorn RH, Konduri GG, Davis SD, Thebaud B, Clyman RI, Collaco JM, Martin**  
458 **CR, Woods JC, Finer NN, and Raju TNK.** Bronchopulmonary Dysplasia: Executive Summary of a  
459 Workshop. *J Pediatr* 197: 300-308, 2018.
- 460 30. **Hikono H, Kohlmeier JE, Ely KH, Scott I, Roberts AD, Blackman MA, and Woodland DL.**  
461 T-cell memory and recall responses to respiratory virus infections. *Immunol Rev* 211: 119-132, 2006.
- 462 31. **Hoo AF, Gupta A, Lum S, Costeloe KL, Huertas-Ceballos A, Marlow N, and Stocks J.**  
463 Impact of ethnicity and extreme prematurity on infant pulmonary function. *Pediatric pulmonology* 49:  
464 679-687, 2014.
- 465 32. **Kotecha SJ, Edwards MO, Watkins WJ, Henderson AJ, Paranjothy S, Dunstan FD, and**  
466 **Kotecha S.** Effect of preterm birth on later FEV1: a systematic review and meta-analysis. *Thorax* 68:  
467 760-766, 2013.
- 468 33. **Livak KJ, and Schmittgen TD.** Analysis of relative gene expression data using real-time  
469 quantitative PCR and the 2(-Delta Delta C(T)) Method. *Methods* 25: 402-408, 2001.
- 470 34. **Lopez-Dee Z, Pidcock K, and Gutierrez LS.** Thrombospondin-1: multiple paths to  
471 inflammation. *Mediators Inflamm* 2011: 296069, 2011.
- 472 35. **Maduekwe ET, Buczynski BW, Yee M, Rangasamy T, Stevens TP, Lawrence BP, and**  
473 **O'Reilly MA.** Cumulative Neonatal Oxygen Exposure Predicts Response of Adult Mice Infected With  
474 Influenza A Virus. *Pediatr Pulm* 50: 222-230, 2015.
- 475 36. **Maitre NL, Ballard RA, Ellenberg JH, Davis SD, Greenberg JM, Hamvas A, Pryhuber GS,**  
476 **Prematurity, and Respiratory Outcomes P.** Respiratory consequences of prematurity: evolution of a  
477 diagnosis and development of a comprehensive approach. *J Perinatol* 35: 313-321, 2015.
- 478 37. **Nardiello C, Mizikova I, Silva DM, Ruiz-Camp J, Mayer K, Vadasz I, Herold S, Seeger W,**  
479 **and Morty RE.** Standardisation of oxygen exposure in the development of mouse models for  
480 bronchopulmonary dysplasia. *Dis Model Mech* 10: 185-196, 2017.

- 481 38. **O'Reilly M, Harding R, and Sozo F.** Altered small airways in aged mice following neonatal  
482 exposure to hyperoxic gas. *Neonatology* 105: 39-45, 2014.
- 483 39. **O'Reilly MA, Marr SH, Yee M, McGrath-Morrow SA, and Lawrence BP.** Neonatal  
484 hyperoxia enhances the inflammatory response in adult mice infected with influenza A virus. *American*  
485 *journal of respiratory and critical care medicine* 177: 1103-1110, 2008.
- 486 40. **O'Reilly MA, Marr SH, Yee M, McGrath-Morrow SA, and Lawrence BP.** Neonatal  
487 hyperoxia enhances the inflammatory response in adult mice infected with influenza A virus. *Am J Resp*  
488 *Crit Care* 177: 1103-1110, 2008.
- 489 41. **O'Reilly MA, Yee M, Buczynski BW, Vitiello PF, Keng PC, Welle SL, Finkelstein JN, Dean**  
490 **DA, and Lawrence BP.** Neonatal Oxygen Increases Sensitivity to Influenza A Virus Infection in Adult  
491 Mice by Suppressing Epithelial Expression of Ear1. *Am J Pathol* 181: 441-451, 2012.
- 492 42. **Osterreicher CH, Penz-Osterreicher M, Grivennikov SI, Guma M, Koltsova EK, Datz C,**  
493 **Sasik R, Hardiman G, Karin M, and Brenner DA.** Fibroblast-specific protein 1 identifies an  
494 inflammatory subpopulation of macrophages in the liver. *Proc Natl Acad Sci U S A* 108: 308-313, 2011.
- 495 43. **Raffay TM, Dylag AM, Sattar A, Abu Jawdeh EG, Cao S, Pax BM, Loparo KA, Martin**  
496 **RJ, and Di Fiore JM.** Neonatal intermittent hypoxemia events are associated with diagnosis of  
497 bronchopulmonary dysplasia at 36 weeks postmenstrual age. *Pediatric research* 85: 318-323, 2019.
- 498 44. **Regal JF, Lawrence BP, Johnson AC, Lojovich SJ, and O'Reilly MA.** Neonatal oxygen  
499 exposure alters airway hyperresponsiveness but not the response to allergen challenge in adult mice.  
500 *Pediat Allerg Imm-Uk* 25: 180-186, 2014.
- 501 45. **Resovi A, Pinessi D, Chiorino G, and Taraboletti G.** Current understanding of the  
502 thrombospondin-1 interactome. *Matrix Biol* 37: 83-91, 2014.
- 503 46. **Reyburn B, Martin RJ, Prakash YS, and MacFarlane PM.** Mechanisms of injury to the  
504 preterm lung and airway: implications for long-term pulmonary outcome. *Neonatology* 101: 345-352,  
505 2012.
- 506 47. **Robin B, Kim YJ, Huth J, Klocksieben J, Torres M, Tepper RS, Castile RG, Solway J,**  
507 **Hershenson MB, and Goldstein-Filbrun A.** Pulmonary function in bronchopulmonary dysplasia.  
508 *Pediatric pulmonology* 37: 236-242, 2004.
- 509 48. **Rogers NM, Ghimire K, Calzada MJ, and Isenberg JS.** Matricellular protein  
510 thrombospondin-1 in pulmonary hypertension: multiple pathways to disease. *Cardiovasc Res* 113: 858-  
511 868, 2017.
- 512 49. **Royce SG, Nold MF, Bui C, Donovan C, Lam M, Lamanna E, Rudloff I, Bourke JE, and**  
513 **Nold-Petry CA.** Airway Remodeling and Hyperreactivity in a Model of Bronchopulmonary Dysplasia  
514 and Their Modulation by IL-1 Receptor Antagonist. *Am J Resp Cell Mol* 55: 858-868, 2016.
- 515 50. **Saito A, Horie M, and Nagase T.** TGF-beta Signaling in Lung Health and Disease. *Int J Mol*  
516 *Sci* 19: 2018.
- 517 51. **Sampalis JS.** Morbidity and mortality after RSV-associated hospitalizations among premature  
518 Canadian infants. *J Pediatr* 143: S150-156, 2003.
- 519 52. **Sanchez-Solis M, Garcia-Marcos L, Bosch-Gimenez V, Perez-Fernandez V, Pastor-Vivero**  
520 **MD, and Mondejar-Lopez P.** Lung function among infants born preterm, with or without  
521 bronchopulmonary dysplasia. *Pediatric pulmonology* 47: 674-681, 2012.
- 522 53. **Slaughter JL, Stenger MR, Reagan PB, and Jadcherla SR.** Inhaled bronchodilator use for  
523 infants with bronchopulmonary dysplasia. *Journal of Perinatology* 35: 61-66, 2015.
- 524 54. **Slaughter JL, Stenger MR, Reagan PB, and Jadcherla SR.** Utilization of inhaled  
525 corticosteroids for infants with bronchopulmonary dysplasia. *PloS one* 9: e106838, 2014.
- 526 55. **Smith VC, Zupancic JAF, McCormick MC, Croen LA, Greene J, Escobar GJ, and**  
527 **Richardson DK.** Rehospitalization in the first year of life among infants with bronchopulmonary  
528 dysplasia. *J Pediatr-Us* 144: 799-803, 2004.
- 529 56. **Speer CP, and Silverman M.** Issues relating to children born prematurely. *Eur Respir J Suppl*  
530 27: 13s-16s, 1998.

- 531 57. **Stevens TP, Dylag A, Panthagani I, Pryhuber G, and Halterman J.** Effect of cumulative  
532 oxygen exposure on respiratory symptoms during infancy among VLBW infants without  
533 bronchopulmonary dysplasia. *Pediatric pulmonology* 45: 371-379, 2010.
- 534 58. **Van Reeth K.** Cytokines in the pathogenesis of influenza. *Vet Microbiol* 74: 109-116, 2000.
- 535 59. **Vyas-Read S, Wang WY, Kato S, Colvocoreesses-Dodds J, Fifadara NH, Gauthier TW,**  
536 **Helms MN, Carlton DP, and Brown LAS.** Hyperoxia induces alveolar epithelial-to-mesenchymal cell  
537 transition. *Am J Physiol-Lung C* 306: L326-L340, 2014.
- 538 60. **Walsh MC, Yao Q, Gettner P, Hale E, Collins M, Hensman A, Everette R, Peters N, Miller**  
539 **N, Muran G, Auten K, Newman N, Rowan G, Grisby C, Arnell K, Miller L, Ball B, McDavid G,**  
540 **National Institute of Child H, and Human Development Neonatal Research N.** Impact of a  
541 physiologic definition on bronchopulmonary dysplasia rates. *Pediatrics* 114: 1305-1311, 2004.
- 542 61. **Wang H, Jafri A, Martin RJ, Nnanabu J, Farver C, Prakash YS, and MacFarlane PM.**  
543 Severity of neonatal hyperoxia determines structural and functional changes in developing mouse  
544 airway. *Am J Physiol-Lung C* 307: L295-L301, 2014.
- 545 62. **Warburton D, and Kaartinen V.** When the lung is stretched, could it be thrombospondin via  
546 TGFbeta1 peptide activation? *J Physiol* 584: 365, 2007.
- 547 63. **Warner BB, Stuart LA, Papes RA, and Wispe JR.** Functional and pathological effects of  
548 prolonged hyperoxia in neonatal mice. *Am J Physiol-Lung C* 275: L110-L117, 1998.
- 549 64. **Warren R, Domm W, Yee M, Campbell A, Malone J, Wright T, Mayer-Proschel M, and**  
550 **O'Reilly MA.** Ataxia-telangiectasia mutated is required for the development of protective immune  
551 memory after influenza A virus infection. *Am J Physiol Lung Cell Mol Physiol* 317: L591-L601, 2019.
- 552 65. **Weisman LE.** Populations at risk for developing respiratory syncytial virus and risk factors for  
553 respiratory syncytial virus severity: infants with predisposing conditions. *Pediatr Infect Dis J* 22: S33-  
554 37; discussion S37-39, 2003.
- 555 66. **Yang HP, Fu JH, Xue XD, Yao L, Qiao L, Hou A, Jin LL, and Xing YJ.** Epithelial-  
556 Mesenchymal Transitions in Bronchopulmonary Dysplasia of Newborn Rats. *Pediatr Pulm* 49: 1112-  
557 1123, 2014.
- 558 67. **Yee M, Buczynski BW, Lawrence BP, and O'Reilly MA.** Neonatal Hyperoxia Increases  
559 Sensitivity of Adult Mice to Bleomycin-Induced Lung Fibrosis. *Am J Resp Cell Mol* 48: 258-266, 2013.
- 560 68. **Yee M, Cohen ED, Domm W, Porter GA, Jr., McDavid AN, and O'Reilly MA.** Neonatal  
561 hyperoxia depletes pulmonary vein cardiomyocytes in adult mice via mitochondrial oxidation. *Am J*  
562 *Physiol Lung Cell Mol Physiol* 314: L846-L859, 2018.
- 563 69. **Yee M, Gelein R, Mariani TJ, Lawrence BP, and O'Reilly MA.** The Oxygen Environment at  
564 Birth Specifies the Population of Alveolar Epithelial Stem Cells in the Adult Lung. *Stem cells (Dayton,*  
565 *Ohio)* 34: 1396-1406, 2016.
- 566 70. **Yee M, White RJ, Awad HA, Bates WA, McGrath-Morrow SA, and O'Reilly MA.** Neonatal  
567 hyperoxia causes pulmonary vascular disease and shortens life span in aging mice. *Am J Pathol* 178:  
568 2601-2610, 2011.
- 569 71. **Zhao L, Yee M, and O'Reilly MA.** Transdifferentiation of alveolar epithelial type II to type I  
570 cells is controlled by opposing TGF-beta and BMP signaling. *Am J Physiol Lung Cell Mol Physiol* 305:  
571 L409-418, 2013.

572

573



574 **Figure Legends**

575

576 **Figure 1.** A) Model timeline of hyperoxia exposure and recovery in naïve mice. B) H&E sections of RA  
577 and hyperoxia (40% for 8 days; 40x8) exposed mice resemble RA controls at PND 56. C) Pulmonary  
578 function measurements are similar between RA and 40x8 mice for Respiratory System Resistance  
579 ( $R_{rs}$ ), Newtonian airway resistance ( $R_N$ ), Respiratory system compliance ( $C_{rs}$ ), Tissue Damping (G),  
580 Elastance (H), and hysteresivity ( $\eta$ , eta).  $n \geq 8$  per group. D) qRT-PCR of RA and 40x8 mice at PND 56  
581 shows increased *Tsp1* and similar expression levels of other identified candidate genes. Data represent  
582 means  $\pm$  SEM. \*\*  $p \leq 0.01$ . Scale bar = 100  $\mu$ m.

583

584 **Figure 2.** Lung samples were obtained from C57BL/6J A) mice at PND 56 that were exposed to oxygen  
585 at PND 0-8, and B) former premature infants at 1-2 year who passed away from BPD with non-BPD  
586 age-matched controls. Slides were stained with antibody to TSP-1 (red) and counterstained with DAPI  
587 (blue). White arrows indicate TSP-1+ cells. aw = airway. N = 3 samples per group. Scale bar = 100  $\mu$ m.

588

589 **Figure 3.** qRT-PCR was performed at PND 56 on naïve RA and 40x8 mice for A) TGFBR1, B)  
590 TGFBR2, C) TGFBR3, D) SMAD2, E) SMAD3, and F) SMAD4/co-smad. Data represent means  $\pm$  SEM;  
591  $n = 3-4$  samples per group.

592

593 **Figure 4.** A) Experimental timeline for  $O_2$  exposure and IAV exposures. At PND 56, mice previously  
594 exposed to RA or 40x8 at PND 0-8, were intranasally infected with  $10^5$  PFU of H3N2 HKx31 IAV or  
595 PBS (sham). B) Fluorescent NP (red), counterstained with CCSP (green) and DAPI (blue), at PID3  
596 indicates viral infection in small airways of both treatment groups. C) H&E and D) Trichrome stains at  
597 PID 14 indicate increased inflammation and fibrosis around the small airways of  $O_2$ -x31 animals. E)  
598 Sirius red staining at 2 weeks post-infection shows increased collagen deposition in the  $O_2$ -x31  
599 treatment group. F) Increased Sirius red staining was detected around  $O_2$ -x31 airways compared to  
600 RA. G) Animals of both groups that received IAV lost significantly more weight than sham mice, but  
601 similar weight loss occurred between infected groups. H) H&E staining at PID 56 showed a recovered

602 phenotype with resolved inflammation and fibrosis for both groups. Data represent means  $\pm$  SEM;  $n \geq 5$   
603 samples per group. Scale bars = 100  $\mu$ m. PND = post-natal day, PID = post-infection day.

604  
605 Figure 5. Pulmonary function testing at PID14 and 56. A)  $R_{rs}$  and B)  $R_N$  were higher in the O<sub>2</sub>-x31  
606 group at PID14 indicating more hyperactive airways. C)  $C_{rs}$  was decreased in O<sub>2</sub>-x31 animals at both  
607 time points D) G was unchanged at both time points E) H was increased at both time points indicating  
608 increased tissue stiffness F)  $\eta$  remained unchanged at both time points indicating homogenous lung  
609 disease. Data represent means  $\pm$  SEM;  $n \geq 8$  samples per group. \*  $p \leq 0.05$ .  $R_{rs}$  – respiratory system  
610 resistance,  $R_N$  – Newtonian resistance,  $C_{rs}$  – respiratory system compliance, G – tissue damping, H –  
611 tissue elastance,  $\eta$  (eta) - hysteresivity.

612 Figure 6. BALF was collected at PID 3, 7, 10, and 14 from RA-x31 and O<sub>2</sub>-x31 animals. A). Total cells,  
613 B) neutrophils C) lymphocytes, and D) macrophages were enumerated. Total cells were increased in  
614 the RA-x31 group at PID 7 and trends for increased total cells and macrophages were present at PID  
615 14. E) ELISA was performed to determine ratio of activated/total TGF- $\beta$ 1 on PIDs 3 and 7 BALF. A  
616 trend towards a significant increase in O<sub>2</sub>-x31 protein at PID 3 was seen. PID 14 lung slices were  
617 stained with antibodies to FSP-1 (red) and DAPI (blue). F) More FSP-1+ cells were present around O<sub>2</sub>-  
618 x31 airways group compared to RA-x31 controls. Data represent means  $\pm$  SEM;  $n \geq 5$  samples per  
619 group. #  $p < 0.10$  (trend), \*  $p \leq 0.05$ , \*\*  $p \leq 0.01$ .

**A**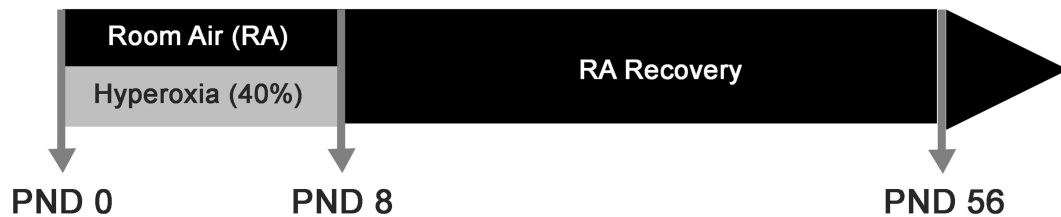**B**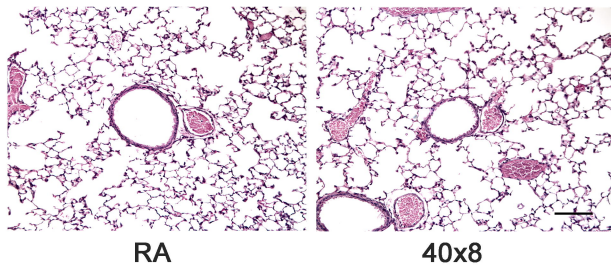**D**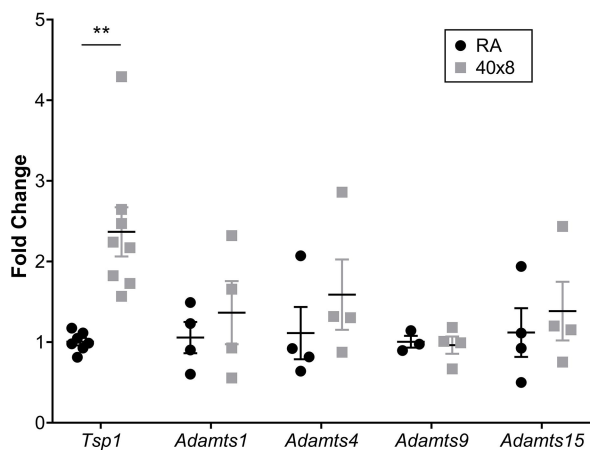**C**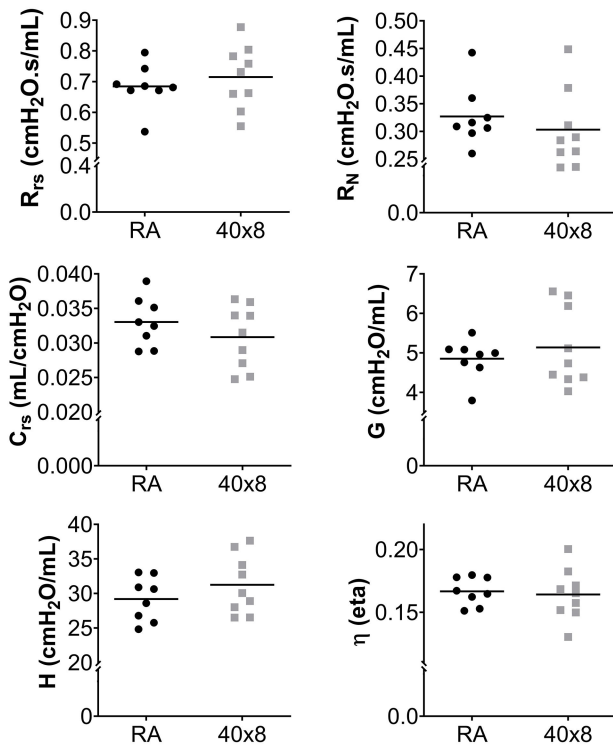

**A**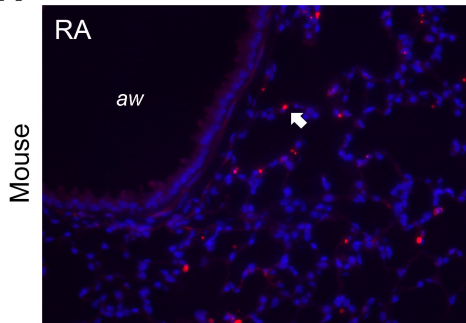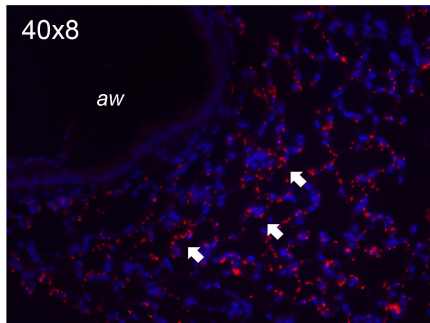**B**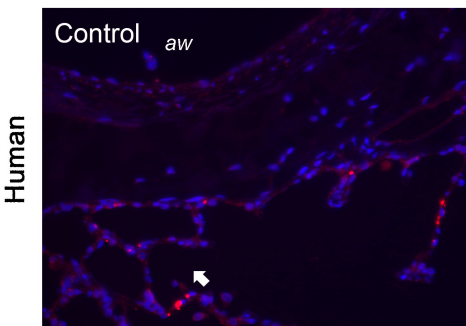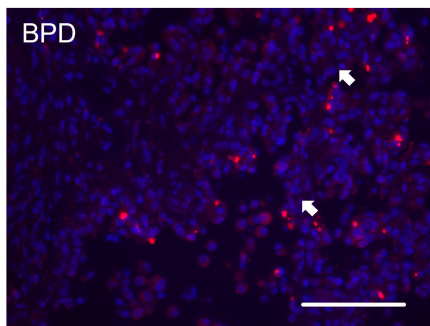

TSP-1 DAPI



**A**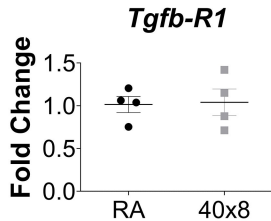**B**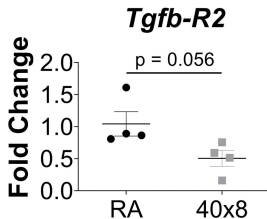**C**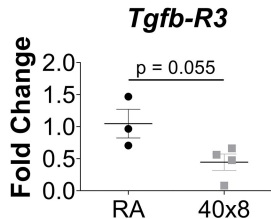**D**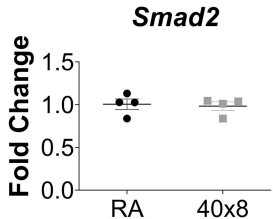**E**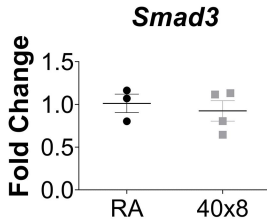**F**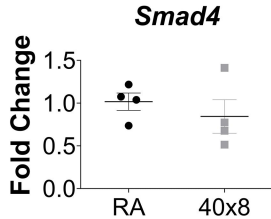

**A**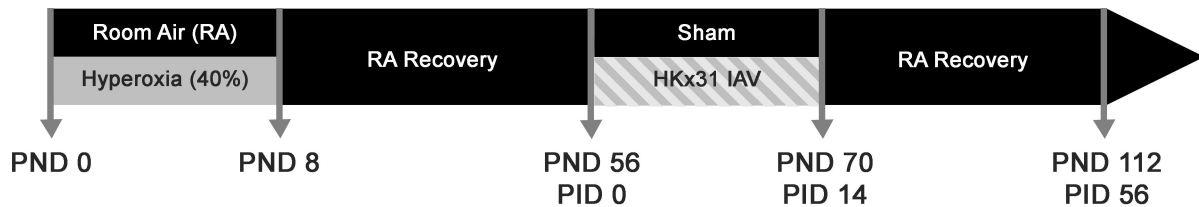**B**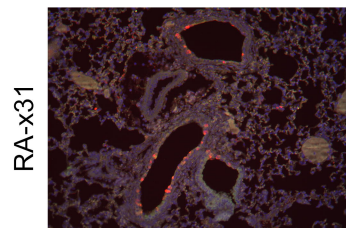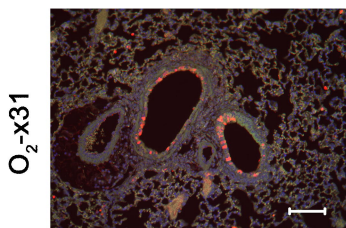

NP CCSP DAPI

**C**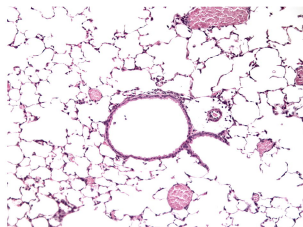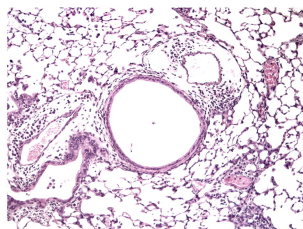**D**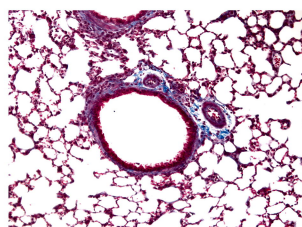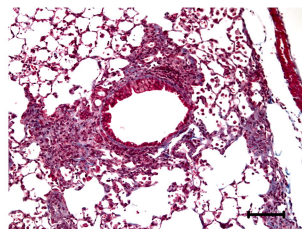**E**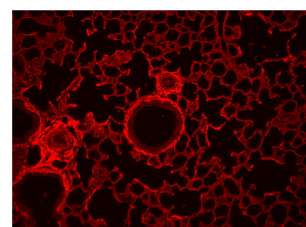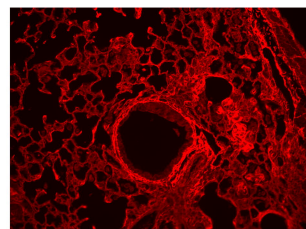**F**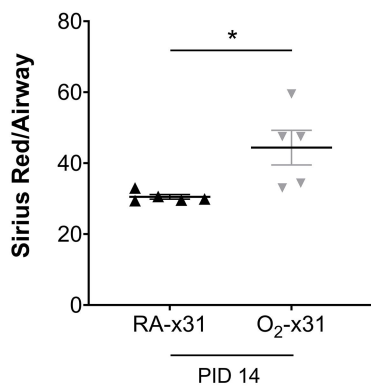**G**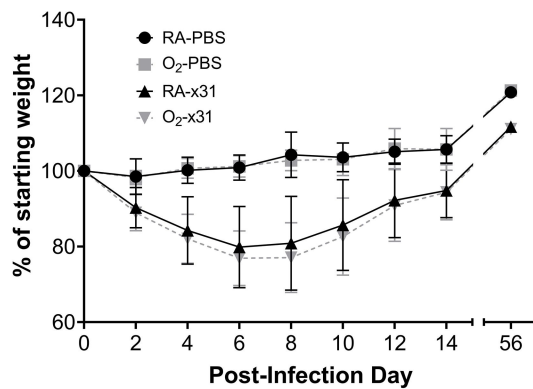**H**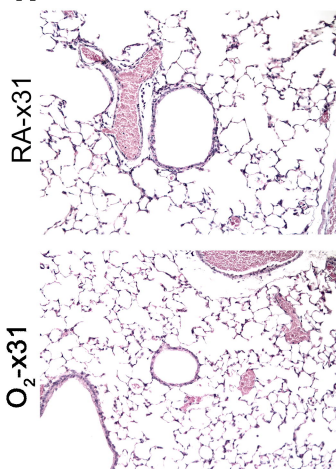

**A**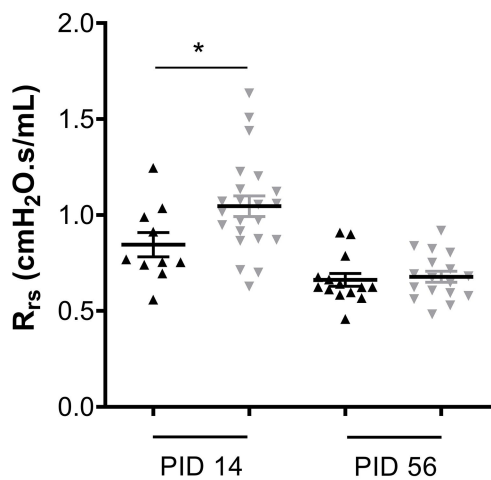**B**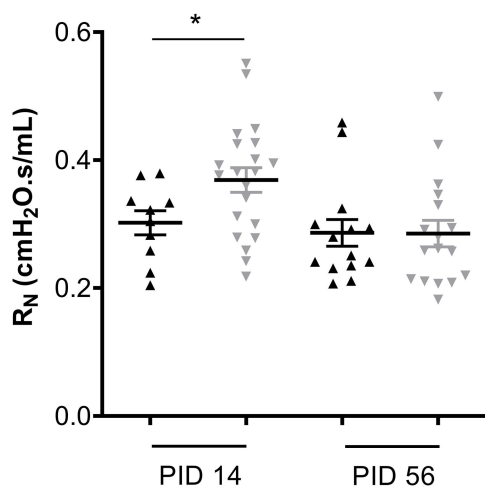**C**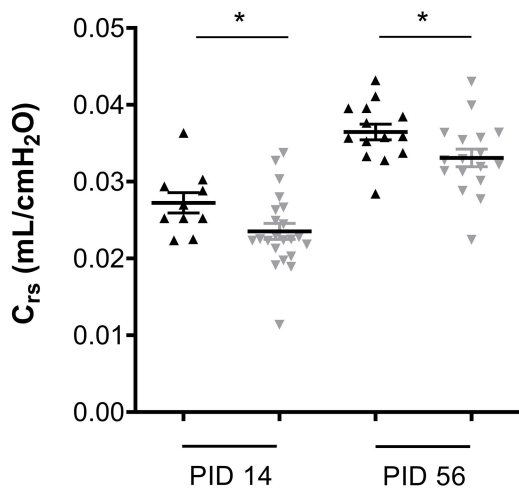**D**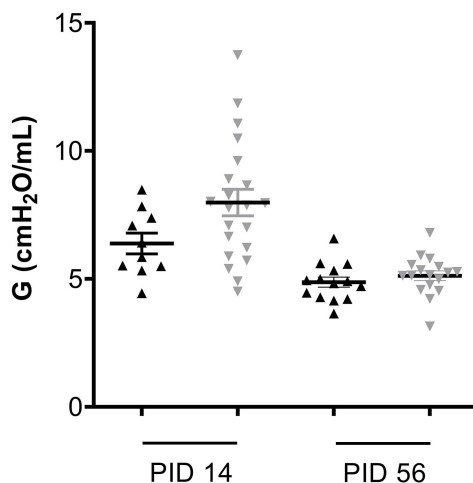**E**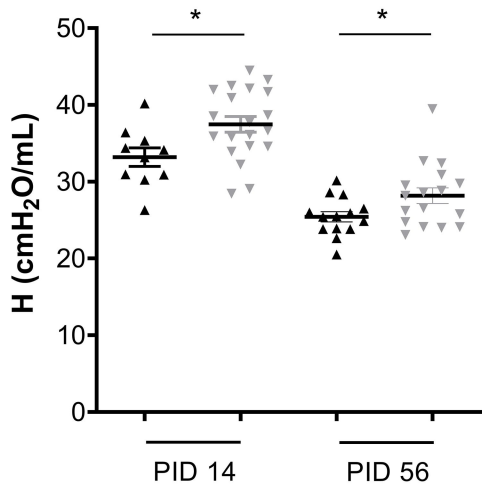**F**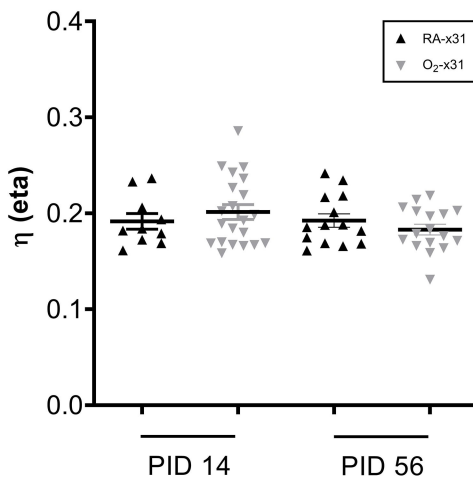

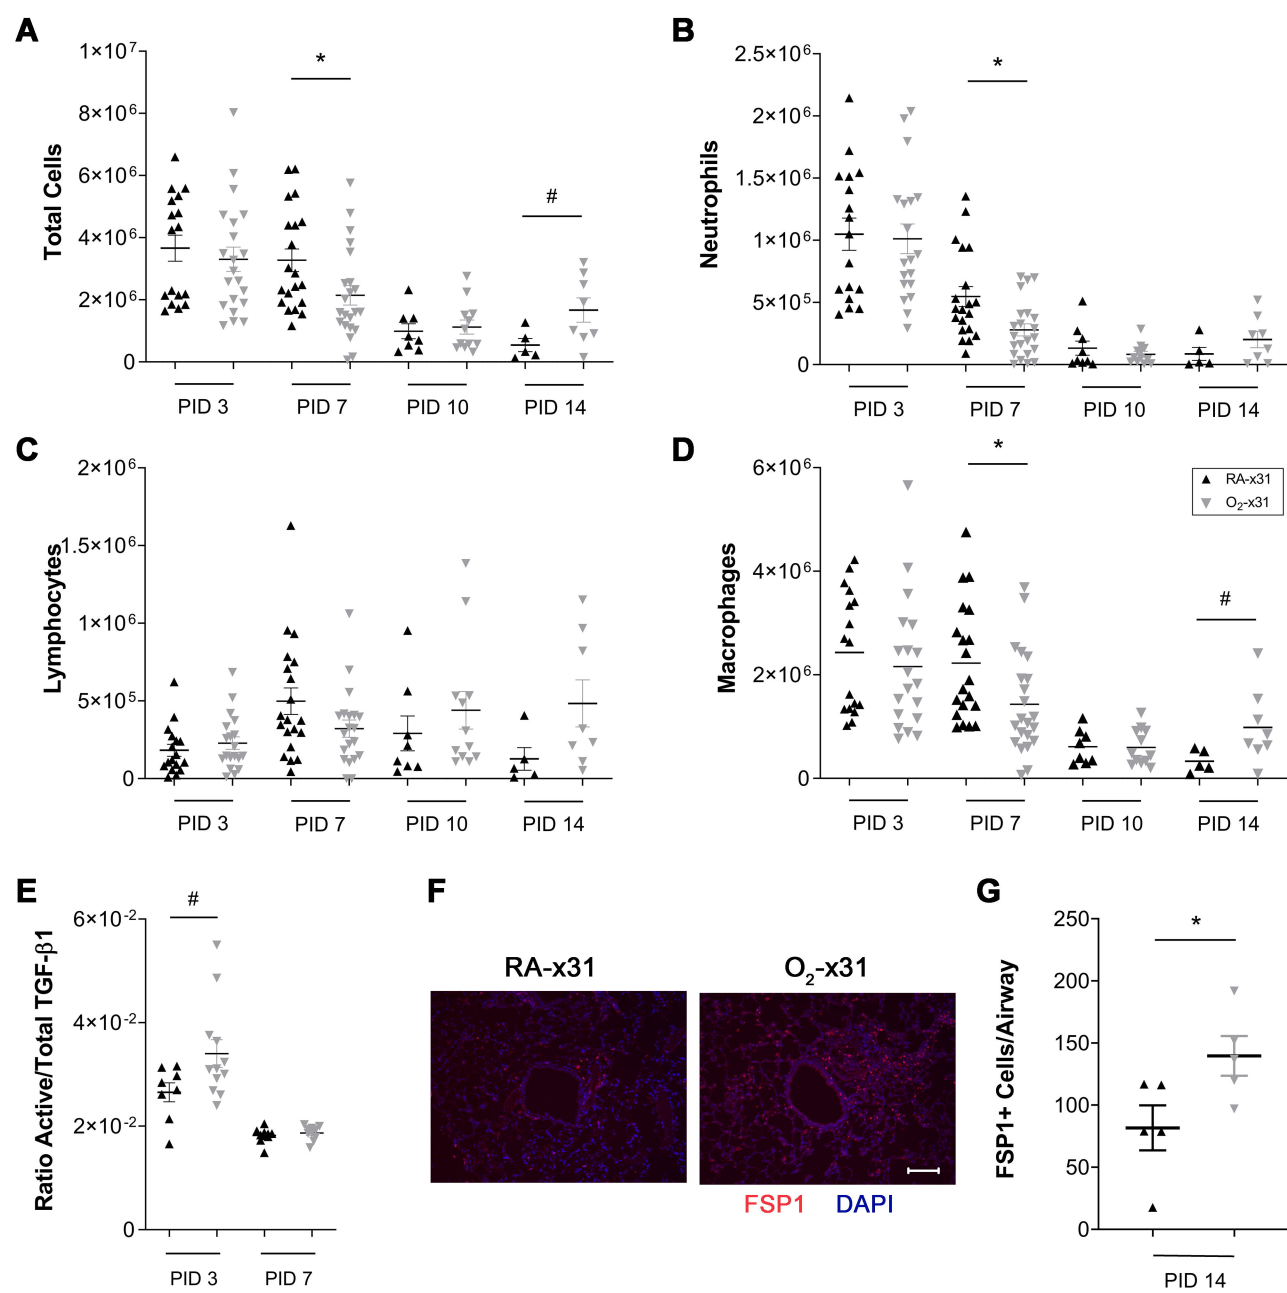

1 **Tables**

2

3 **Table 1. qRT-PCR Primer Sequences.**

| <b>Primer</b>                    | <b>Forward (5' - 3')</b>       | <b>Reverse (5' - 3')</b>       |
|----------------------------------|--------------------------------|--------------------------------|
| <i>mTsp-1</i>                    | TCC CCT ATT CTG GAG GGT TC     | TCC CTG GAA ATA GGC ACA AG     |
| <i>mAdamts1</i>                  | CTC GTA GCT GAC CAG TCC AT     | ACT TCT GGT CCC TTC TGC TC     |
| <i>mAdamts4</i>                  | CAG ACG AAG CAC TCA CCT T      | CCA GCC TGA GGA ACA TTG A      |
| <i>mAdamts9</i>                  | GCC TGT GCT ACC TTA CCT AAA C  | CCA CAA GTC ACG GAA CAA GAG    |
| <i>mAdamts15</i>                 | TGA TCT GTC TCC GAC CCT CA     | GAC TCA CCA TGC CCA CT         |
| <i>mTgf<math>\beta</math>-R1</i> | AAA ACA GGG GCA GTT ACT ACA AC | TGG CAG ATA TAG ACC ATC AGC A  |
| <i>mTgf<math>\beta</math>-R2</i> | AAC ATG GAA GAG TGC AAC GAT    | CGT CAC TTG GAT AAT GAC CAA CA |
| <i>mTgf<math>\beta</math>-R3</i> | GGT GTG AAC TGT CAC CGA TCA    | GTT TAG GAT GTG AAC CTC CCT TG |
| <i>mSmad1</i>                    | ACC CCT ACC ACT ATA AGC GAG    | TGC TGG AAA GAG TCT GGG AAC    |
| <i>mSmad2</i>                    | ATG TCG TCC ATC TTG CCA TTC    | AAC CGT CCT GTT TTC TTT AGC TT |
| <i>mSmad3</i>                    | CAC AGC CAC CAT GAA TTA CGG    | TGG CGT CTC TAC TCT CTG ATA GT |
| <i>mSmad4</i>                    | CAT TCC AGC GTG CCA TTT C      | TTC AAA GTA AGC AAT GGA GCA C  |
| <i>mGapdh</i>                    | TGT CCG TCG TGG ATC TGA C      | CCT GCT TCA CCA CCT TCT TG     |

4
